# Supplementary material for: Investigating the effects of silk fibroin on ultrasound-mediated ultrafine bubble drug transport and delivery systems
Source: Royal Society of Chemistry journal article supplement (doi:10.1039/d5ra00334b), 2025-01-01
Supplement: d5ra00334b1.pdf [file d5ra00334b1.pdf]

## SUPPLEMENTAL MATERIALS

**Table S1.** Detailed concentrations of each component in the bubble system of 4 samples and 3 controls used in the study.

| Sample / Control name | [NaCl] <sub>final</sub> (mM) | [QCT] <sub>final</sub> (μM) | [Silk fibroin] <sub>final</sub> (μg/mL) | [Silk fibroin] <sub>final</sub> (μM) | [PEG-400] <sub>final</sub> (%v/v <sub>SF</sub> ) | [PEG-400] <sub>final</sub> (μM) |
|-----------------------|------------------------------|-----------------------------|-----------------------------------------|--------------------------------------|--------------------------------------------------|---------------------------------|
| S10P2                 | 154                          | 50                          | 10                                      | 0.10                                 | 2                                                | 564                             |
| S10P1                 | 154                          | 50                          | 10                                      | 0.10                                 | 1                                                | 282                             |
| S5P2                  | 154                          | 50                          | 5                                       | 0.05                                 | 2                                                | 264                             |
| S5P1                  | 154                          | 50                          | 5                                       | 0.05                                 | 1                                                | 282                             |
| C-Ø                   | 154                          | 50                          | 0                                       | 0                                    | 0                                                | 0                               |
| C-SF                  | 154                          | 50                          | 10                                      | 0.10                                 | 0                                                | 0                               |
| C-PEG                 | 154                          | 50                          | 0                                       | 0                                    | 2                                                | 564                             |

**Table S2.** Statistical results from one-tailed Mann Whitney U test comparing S10P2 system with three controls'  $\Delta_{scattering}$  to conclude on differences of their stability.

| Test samples | Hypotheses                                                                                                               | Sample size | p-value | Significant level | Conclusions           |
|--------------|--------------------------------------------------------------------------------------------------------------------------|-------------|---------|-------------------|-----------------------|
| S10P2, C-Ø   | H <sub>0</sub> : S10P2 had a higher or equal decreasing level.<br>H <sub>1</sub> : S10P2 had the lower decreasing level. | 5, 5        | 0.004   | 0.05              | Reject H <sub>0</sub> |
| S10P2, C-SF  |                                                                                                                          | 5, 5        | 0.004   | 0.05              |                       |
| S10P2, C-PEG |                                                                                                                          | 5, 5        | 0.014   | 0.05              |                       |

**Table S3.** Statistical results from one-tailed Mann Whitney U test comparing four different SF-PEG formulations, S10P2, S10P1, S5P2, S5P1's  $\Delta_{scattering}$  to conclude on differences of their stability.

| Test samples | Hypotheses                                                                                                               | Sample size | p-value | Significant level | Conclusions                   |
|--------------|--------------------------------------------------------------------------------------------------------------------------|-------------|---------|-------------------|-------------------------------|
| S10P2, S10P1 | H <sub>0</sub> : S10P2 had a higher or equal decreasing level.<br>H <sub>1</sub> : S10P2 had the lower decreasing level. | 5, 5        | 0.008   | 0.05              | Reject H <sub>0</sub>         |
| S10P2, S5P2  |                                                                                                                          | 5, 5        | 0.826   | 0.05              | Fail to reject H <sub>0</sub> |
| S10P2, S5P1  |                                                                                                                          | 5, 5        | 0.004   | 0.05              | Reject H <sub>0</sub>         |

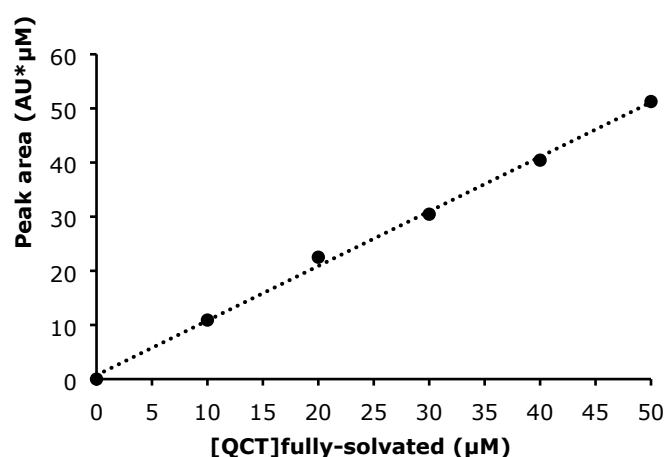

**Figure S1.** Standard curve plotting  $[QCT]_{\text{fully-solvated}}$ , fully-solvated or unloaded quercetin concentration, with its corresponding UV-Vis peak area.

**Table S4.** Measured peak area from UV-Vis with its corresponding concentration (μM) using standard curve in Figure S1, and the resulting loaded concentration (μM) for two SF-PEG formulations and three controls. The data for the triplicates were reported under the form of mean(±SD).

| Sample names | Peak area    | $[QCT]_{\text{supernatant/}}$<br>from the<br>standard curve<br>(μM) | $[QCT]_{\text{initial -}}$<br>$[QCT]_{\text{supernatant/}}$ or loaded<br>concentration (μM) |
|--------------|--------------|---------------------------------------------------------------------|---------------------------------------------------------------------------------------------|
| S10P2        | 10.26(±1.76) | 9.46(±1.75)                                                         | 40.54(±1.75)                                                                                |
| S5P2         | 8.42(±0.88)  | 7.63(±0.88)                                                         | 42.37(±0.88)                                                                                |
| C-Ø          | 5.05(±0.58)  | 4.29(±0.57)                                                         | 45.71(±0.57)                                                                                |
| C-SF         | 7.25(±2.48)  | 6.47(±2.46)                                                         | 43.53(±2.46)                                                                                |
| C-PEG        | 14.21(±6.14) | 13.37(±6.09)                                                        | 36.63(±6.09)                                                                                |

**Table S5.** Results of six one-tailed Mann Whitney U tests on the loading efficiency, LE%, between two samples, S10P2 and S5P2, with three controls, C-Ø, C-SF, and C-PEG.

| Test samples | Hypotheses                                                                                     | Sample size | p-value | Significant level | Conclusions                   |
|--------------|------------------------------------------------------------------------------------------------|-------------|---------|-------------------|-------------------------------|
| S10P2, C-Ø   | H <sub>0</sub> : S10P2 had a higher or equal LE%.<br>H <sub>1</sub> : S10P2 had the lower LE%. | 3, 3        | 0.004   | 0.05              | Reject H <sub>0</sub>         |
| S10P2, C-SF  |                                                                                                | 3, 3        | 0.014   | 0.05              | Reject H <sub>0</sub>         |
| S10P2, C-PEG |                                                                                                | 3, 3        | 0.125   | 0.05              | Fail to reject H <sub>0</sub> |

|                |                                                                                              |      |       |      |                               |
|----------------|----------------------------------------------------------------------------------------------|------|-------|------|-------------------------------|
| S5P2,<br>C-Ø   | H <sub>0</sub> : S5P2 had a higher or equal LE%.<br>H <sub>1</sub> : S5P2 had the lower LE%. | 3, 3 | 0.004 | 0.05 | Reject H <sub>0</sub>         |
| S5P2,<br>C-SF  |                                                                                              | 3, 3 | 0.023 | 0.05 | Reject H <sub>0</sub>         |
| S5P2,<br>C-PEG |                                                                                              | 3, 3 | 0.232 | 0.05 | Fail to reject H <sub>0</sub> |

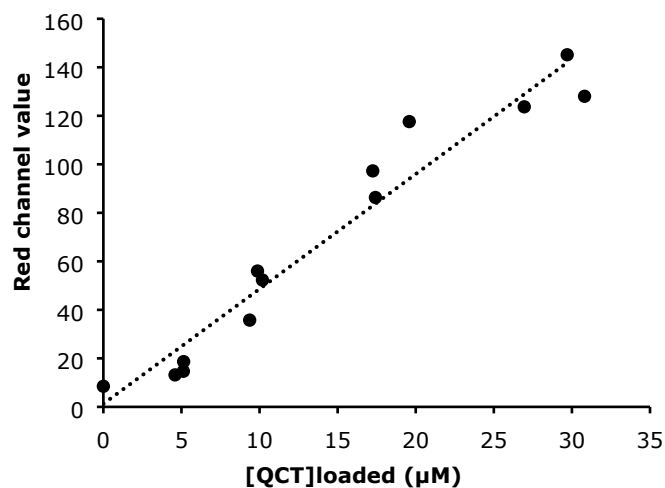

**Figure S2.** Standard curve plotting loaded quercetin concentration ( $\mu\text{M}$ ),  $[\text{QCT}]_{\text{loaded}}$ , with its corresponding red channel value.

**Table S6.** Measured red channel value with its corresponding remained-loaded concentration ( $\mu\text{M}$ ) using standard curve in Figure S2, and the resulting released concentration ( $\mu\text{M}$ ) for two SF-PEG formulations and three controls. The data for the triplicates were reported under the form of mean( $\pm$ SD).

| Sample names | Red channel value after release | $[\text{QCT}]_{\text{remained}}$ ( $\mu\text{M}$ ) | $[\text{QCT}]_{\text{loaded}} - [\text{QCT}]_{\text{remained}}$ , or $[\text{QCT}]_{\text{released}}$ ( $\mu\text{M}$ ) |
|--------------|---------------------------------|----------------------------------------------------|-------------------------------------------------------------------------------------------------------------------------|
| S10P2        | 100.27( $\pm$ 4.16)             | 20.91( $\pm$ 0.88)                                 | 19.64( $\pm$ 0.69)                                                                                                      |
| S5P2         | 103.98( $\pm$ 4.93)             | 21.69( $\pm$ 1.04)                                 | 20.68( $\pm$ 0.68)                                                                                                      |
| C-Ø          | 114.71( $\pm$ 1.60)             | 23.95( $\pm$ 0.34)                                 | 21.75( $\pm$ 0.24)                                                                                                      |
| C-SF         | 111.29( $\pm$ 8.41)             | 23.23( $\pm$ 1.78)                                 | 20.30( $\pm$ 0.51)                                                                                                      |
| C-PEG        | 95.55( $\pm$ 12.11)             | 19.91( $\pm$ 2.56)                                 | 16.72( $\pm$ 0.62)                                                                                                      |

**Table S7.** Results of six one-tailed Mann Whitney U tests on the releasing efficiency, RE%, between two samples, S10P2 and S5P2, with three controls, C-Ø, C-SF, and C-PEG.

| Test samples | Hypotheses                                                                                     | Sample size | p-value | Significant level | Conclusions                   |
|--------------|------------------------------------------------------------------------------------------------|-------------|---------|-------------------|-------------------------------|
| S10P2, C-Ø   | H <sub>0</sub> : S10P2 had a higher or equal RE%.<br>H <sub>1</sub> : S10P2 had the lower RE%. | 3, 3        | 0.087   | 0.05              | Fail to reject H <sub>0</sub> |
| S10P2, C-SF  |                                                                                                | 3, 3        | 0.087   | 0.05              | Fail to reject H <sub>0</sub> |
| S10P2, C-PEG |                                                                                                | 3, 3        | 0.087   | 0.05              | Fail to reject H <sub>0</sub> |
| S5P2, C-Ø    | H <sub>0</sub> : S5P2 had a higher or equal RE%.<br>H <sub>1</sub> : S5P2 had the lower RE%.   | 3, 3        | 0.087   | 0.05              | Fail to reject H <sub>0</sub> |
| S5P2, C-SF   |                                                                                                | 3, 3        | 0.125   | 0.05              | Fail to reject H <sub>0</sub> |
| S5P2, C-PEG  |                                                                                                | 3, 3        | 0.087   | 0.05              | Fail to reject H <sub>0</sub> |
